# Supplementary material for: The Older Adult Positivity Effect in Evaluations of Trustworthiness: Emotion Regulation or Cognitive Capacity?
Source: PLOS journal article supplement (doi:10.1371/journal.pone.0169823), 2017-01-06
Supplement: S3 (10.1371/journal.pone.0169823.s003) [file journal.pone.0169823.s003]

## **Zebrowitz et al. PLOS ONE raw Data**

### **Study 1 and Study 2 Codes:**

**AGE\_CODE:** Participant Age category (1 = younger adult/YA; 2 = older adult/OA)

**SEX\_CODE:** Participant Sex (1 = male; 2 = female)

**Age:** Participant age in years

**Avg:** Trustworthy ratings of Medium Attractive faces (Study 1) or Medium Trustworthy faces (Study 2)

**Att:** Trustworthy ratings of High Attractive faces (Study 1)

**Un:** Trustworthy ratings of Low Attractive faces (Study 1)

**All:** Trustworthy Ratings averaged across male and female faces (Study 1) or younger and older faces (Study 2).

**Fem:** Trustworthy ratings of Female faces (Study 1)

**Male:** Trustworthy ratings of Male faces (Study 1)

**High:** Trustworthy ratings of High Trustworthy faces (Study 2)

**Low:** Trustworthy ratings of Low Trustworthy faces (Study 2)

**D:** Trustworthy ratings made with high distraction (Study 1 and 2)

**ND:** Trustworthy ratings made with low distraction (Study 1 and 2)

**WCST:** scores from Berg Card Sort Task (BCST; Piper et al., 2012).

**MMSE:** scores from Mini-mental state exam (administered only to OA)

**Snellen:** denominator from visual acuity test

**MARS2:** Letter contrast sensitivity with corrective lenses (Mars Perceptrix, Chappaqua, NY)

**Benton:** Facial recognition test; (Benton, Van Allen, Shamsler, & Levin, 1983).

**Pattern:** Pattern comparison Test (Salthouse, 1993).

**Shipley:** Shipley Vocabulary Test (Shipley, 1946).

**Note:** Trustworthy ratings made on 7-point scales with higher scores = more trustworthy
